# Supplementary material for: Orthogonal Peptide‐Templated Labeling Elucidates Lateral ETAR/ETBR Proximity and Reveals Altered Downstream Signaling
Source: PubMed Central journal article supplement — Chembiochem. 2021 Oct 26;23(6):e202100340. doi: 10.1002/cbic.202100340 (PMC9298254; doi:10.1002/cbic.202100340), 2021-10-26
Supplement: CBIC-23-0-s001.pdf [file CBIC-23-0-s001.pdf]

# ChemBioChem

Supporting Information

## **Orthogonal Peptide-Templated Labeling Elucidates Lateral ET<sub>A</sub>R/ET<sub>B</sub>R Proximity and Reveals Altered Downstream Signaling**

Philipp Wolf, Alexander Mohr, Georgina Gavins, Victoria Behr, Karin Mörl, Oliver Seitz, and Annette G. Beck-Sickinger\*

|                                                                                                                  |             |
|------------------------------------------------------------------------------------------------------------------|-------------|
| <b>Table of content</b>                                                                                          | <b>S-2</b>  |
| <b>Experimental section</b>                                                                                      | <b>S-3</b>  |
| <b>Polymerase chain reaction primer</b>                                                                          | <b>S-3</b>  |
| <b>Solid phase synthesis of the TAMRA-MPAA-GSGSG conjugate</b>                                                   | <b>S-4</b>  |
| <i>Materials</i>                                                                                                 | <b>S-4</b>  |
| <i>Synthesis of the control conjugate</i>                                                                        | <b>S-5</b>  |
| <b>Generation of nanoluciferase-arrestin-3</b>                                                                   | <b>S-5</b>  |
| <b>Inositol phosphate accumulation assay</b>                                                                     | <b>S-5</b>  |
| <b>Arrestin 3 recruitment assay</b>                                                                              | <b>S-6</b>  |
| <b>Statistical analysis</b>                                                                                      | <b>S-6</b>  |
| <b>Results</b>                                                                                                   | <b>S-7</b>  |
| <b>Activation profile of Cys-P1/P3-ET<sub>A</sub>R/ET<sub>B</sub>R-GFP and proof of principle labeling</b>       | <b>S-7</b>  |
| <b>Determination of orthogonal peptide-templated acyl transfer specificity</b>                                   | <b>S-8</b>  |
| <b>Receptor activation after peptide-templated labeling</b>                                                      | <b>S-9</b>  |
| <b>Determination of labeling probe selectivity</b>                                                               | <b>S-10</b> |
| <b>Determination of labeling efficiency</b>                                                                      | <b>S-11</b> |
| <b>GPCR interaction characteristics derived from proximity-dependent FRET</b>                                    | <b>S-12</b> |
| <b>Determination of ligand selectivity and GPCR activation profiles</b>                                          | <b>S-13</b> |
| <b>Agonist-internalization of GPCRs labeled by peptide-templated acyl transfer reaction</b>                      | <b>S-14</b> |
| <b>Impact of receptor activation on internalization in co-expression setups</b>                                  | <b>S-15</b> |
| <b>Membrane residence time of GPCRs in the absence of agonists</b>                                               | <b>S-16</b> |
| <b>Selective ET<sub>B</sub>R-mediated Ca<sup>2+</sup> flux in the presence of co-transfected ET<sub>A</sub>R</b> | <b>S-17</b> |
| <b>Impact of GPCR co-expression on ET<sub>B</sub>R-mediated Ca<sup>2+</sup> flux in HEK293</b>                   | <b>S-19</b> |
| <b>Investigation of arrestin recruitment to activated ET<sub>B</sub>R in co-expression setups</b>                | <b>S-21</b> |
| <b>References</b>                                                                                                | <b>S-23</b> |

## Experimental section

### Polymerase chain reaction primer

Primer sequences used for N-terminal fusion of (SP)-Cys-P1- and (SP)-Cys-P3-tag to GPCRs and the generation of the Nluc-tagged arrestin 3 constructs are summarized in Supplementary Table S1.

**Table S1:** Primer sequences.

| Code | Primer Name                            | Sequence 5'-3'                                                                                                                                           |
|------|----------------------------------------|----------------------------------------------------------------------------------------------------------------------------------------------------------|
| 1    | Cys-P1-AT <sub>1</sub> R fw            | AAACCGATATCGCCACCATGTGCGAGATCCAGGCCCTGGAGGAGGAGAAACGCCAGCT<br>GGAGCAGGAGAACGCCGCCCTGGAGGAGGAGATCGCCAGCTGGAGTACGGCGGCT<br>CAATGATTCTCAACTCTTCTACTG        |
| 2    | Cys-P3-AT <sub>1</sub> R fw            | AAACCGTCGACGCCACCATGTGCGAGATCCAGCAGCTGGAGGAGGAGATCGCCAGC<br>TGGAGCAGAAGAACGCCGCCCTGAAGGAGAAGAACCAGGCCCTGAAGTACGGCGGCT<br>CAATGATTCTCAACTCTTCTACTGAAGATGG |
| 3    | Cys-P1-APJ fw                          | AAACCGTCGACGCCACCATGTGCGAGATCCAGGCCCTGGAGGAGGAGAAACGCCAGC<br>TGGAGCAGGAGAACGCCGCCCTGGAGGAGGAGATCGCCAGCTGGAGTACGGCGGCT<br>CAATGGAGGAAGGTGGTGAATTTGAC      |
| 4    | Cys-P3-APJ fw                          | AAACCGTCGACGCCACCATGTGCGAGATCCAGCAGCTGGAGGAGGAGATCGCCAGC<br>TGGAGCAGAAGAACGCCGCCCTGAAGGAGAAGAACCAGGCCCTGAAGTACGGCGGCT<br>CAATGGAGGAAGGTGGTGAATTTGAC      |
| 5    | pV2-eYFP-XbaI rev                      | GTGGAGCCAAACGCAGTACAAAG                                                                                                                                  |
| 6    | pVitro2-Sall fw                        | ACACAAAACGTGCAACTTGAAACTC                                                                                                                                |
| 7    | pVitro2-Sall rev                       | TATTGTGCGACACCGGTTGCTTTGAATTAG                                                                                                                           |
| 8    | Sall-Cys-P1-AT <sub>1</sub> R-Stop fw  | AAACGTCGACACCATGTGCGAGATCCAG                                                                                                                             |
| 9    | Sall-Cys-P1/P3-GPCR-Stop fw            | AAACGTCGACGCCACCATGTGCGAGATC                                                                                                                             |
| 10   | AT <sub>1</sub> R-Stop rev             | TTTGTCTAGATTACTCAACCTCAAACATGGTGCAG                                                                                                                      |
| 11   | APJ-Stop rev                           | TTTGTCTAGATTAGTCAACCACAAGGGTCTCCTGGCTG                                                                                                                   |
| 12   | SP-Cys-P1-AT <sub>1</sub> R/APJ-MP fw  | AACCGGTGTCGACGCCACCATGCAGCCGCCTCCAAGTCTG                                                                                                                 |
| 13   | SP-Cys-P1-AT <sub>1</sub> R/APJ-MP rev | CCTCCAGGGCCTGGATCTCGCATCCCCAGATCCGCGACAG                                                                                                                 |
| 14   | SP-Cys-P3-AT <sub>1</sub> R/APJ-MP fw  | AACCGGTGTCGACGCCACCATGCAGCCGCCTCCAAGTCTG                                                                                                                 |
| 15   | SP-Cys-P3-AT <sub>1</sub> R/APJ-MP rev | CCTCCAGCTGCTGGATCTCGCATCCCCAGATCCGCGACAG                                                                                                                 |
| 16   | SP-Cys-P1-ET <sub>A</sub> R fw         | TGGCACTGGTTGGATGTGTAATCAGTTGCGAGATCCAGGCCCTG                                                                                                             |
| 17   | SP-Cys-P1-ET <sub>A</sub> R rev        | TTGCTTAGATTTGTGCTGTATCTCTCAGGATTATCTGAGCCGCCGCTACTCCAG                                                                                                   |
| 18   | SP-Cys-P3-ET <sub>A</sub> R fw         | TGGCACTGGTTGGATGTGTAATCAGTTGCGAGATCCAGCAGCTG                                                                                                             |

|    |                                                  |                                                            |
|----|--------------------------------------------------|------------------------------------------------------------|
| 19 | SP-Cys-P3-ET <sub>A</sub> R rev                  | TGCTTAGATTTGTGCTGTATCTCTCAGGATTATCTGAGCCGCCGTA             |
| 20 | SP-Cys-P1-ET <sub>B</sub> R fw                   | CGGCCTGTCGCGGATCTGGGGATGCGAGATCCAGGCCCTG                   |
| 21 | SP-Cys-P1-ET <sub>B</sub> R rev                  | CAGGCGGGAAGCCTCTCTCTCTGAGCCGCCGTA                          |
| 22 | SP-Cys-P3-ET <sub>B</sub> R fw                   | CGGCCTGTCGCGGATCTGGGGATGCGAGATCCAGCAGCTG                   |
| 23 | SP-Cys-P3-ET <sub>B</sub> R rev                  | CAGGCGGGAAGCCTCTCTCTCTGAGCCGCCGTA                          |
| 24 | Sall-SP-Cys-P1/3-ET <sub>A</sub> R-Stop fw       | AAACGTCGACGCCACCATGGAAACCCTTTGCCTC                         |
| 25 | Sall-SP-Cys-P1/3-ET <sub>A</sub> R-Stop rev      | TTTGTCTAGATTAGTTCATGCTGTCCTTATGGCTGC                       |
| 26 | Sall-SP-Cys-P1/3-ET <sub>B</sub> R-Stop fw       | AAACGTCGACGCCACCATGCAGCCGCCTCCAAGTC                        |
| 27 | Sall-SP-Cys-P1/Cys-P3-ET <sub>B</sub> R-Stop rev | TTTGTCTAGATTAAGATGAGCTGTATTTACTG                           |
| 28 | AfIII_Arr3 Fw                                    | GACTTAAGTCTCGGCGAGCGCTCGACTCCATGGGGGAGAAACCCGGGACCAGGGTCTC |
| 29 | Arr3 Rev                                         | GTTGTTGAATAGGGCAAGCTTCCAGCCCTAATCGATAC                     |
| 30 | AsiSI_Nluc Fw                                    | CTGGAATTCGCGATCGCGGCCACGATGGTCTTCACACTCGAAGATTTGTTG        |
| 31 | AsiSI_Nluc Rev                                   | GAGCGCTCGCCGAGACTTAAGTCCGGACGCCAGAATGCGTTTCGCACAG          |

## Solid phase synthesis of the TAMRA-MPAA-GSGSG conjugate

### Materials

N- $\alpha$ -Fmoc-protected amino acids, ethyl 2-cyano-2-(hydroxyimino)acetate (Oxyma), and N,N'-diisopropylcarbodiimide (DIC) were purchased from Iris Biotech (Marktredwitz, Germany). G-Wang resin and O-(7-azabenzotriazolyl)-tetramethyluronium hexafluorophosphate (HATU) were supplied from Novabiochem (Darmstadt, Germany). 6-Carboxytetramethylrhodamine (TAMRA) was purchased from ChemPep, Inc. (Wellington, Florida). Acetonitrile (ACN) was obtained from VWR (Darmstadt, Germany). Dimethylformamide (DMF) and dichloromethane (DCM) were obtained from Biosolve (Valkenswaard, The Netherlands). N,N-Diisopropylethylamine (DIPEA), 1,2-ethanedithiol (EDT), 4-methoxytriphenylmethyl chloride (Mmt-Cl), mercapto phenyl acetic acid (MPAA), piperidine, thioanisole (TA), trifluoroacetic acid (TFA), and triisopropylsilane (TIS) were purchased from Sigma-Aldrich (Taufkirchen, Germany). Diethyl ether was obtained from Merck (Darmstadt, Germany).

### *Synthesis of the control conjugate*

S-Mmt-protected MPAA was prepared as described in the main manuscript. The control peptide was synthesized on a G-Wang resin (15  $\mu\text{mol}$  scale). Automated synthesis was performed with a SYRO I peptide synthesizer (MultiSynTech; Witten, Germany), using 8 equiv. of N- $\alpha$ -Fmoc-protected amino acids, 8 equiv. Oxyma, and 8 equiv. DIC dissolved in DMF. Automatic coupling steps were carried out twice with a reaction time of 40 min each. For Fmoc deprotection, 40 % (v/v) piperidine in DMF was applied for 3 min and 20 % (v/v) piperidine in DMF for 10 min. The S-Mmt-MPAA-OH (4.5 equiv.) was coupled twice for 45 min each in DMF using 4.5 equiv. HATU, and 8 equiv. DIC dissolved in DMF. After Mmt deprotection, using DCM/TFA/TIS (96:2:2, 2x1 min), TAMRA was coupled with 1.9 equiv HATU and 2 equiv DIPEA for approximately 18 h at RT. Peptides were cleaved from the resin with TFA/H<sub>2</sub>O/TIS (96:2:2) and precipitated from diethyl ether. Purification peptide was carried out on a RP-HPLC (Shimadzu) equipped with a Phenomenex Kinetex C18 100 Å column by applying a linear binary gradient of eluent A (0.1 % TFA in water, v/v) and B (0.08 % TFA in ACN). Peptide purity was confirmed by analytical RP-HPLC, and peptide identity was verified by mass spectrometry: MALDI-ToF mass spectrometry (UltraflexIII, Bruker Daltonics), and ESI-ion trap mass spectrometry (HCT, Bruker). Peptides were kept as a 10<sup>-4</sup> M stock aqueous solution, containing 0.1 % TFA.

### **Generation of nanoluciferase-arrestin-3**

The cDNA of bovine arrestin-3 (arr-3) was amplified from the previously described pcDNA3.1-Rluc3-Arr3 plasmid<sup>[1]</sup> introducing a 5' AflIII restriction site (primer: 28 and 29). The Nluc cDNA, containing a 5' secretion sequence, was amplified from the pNL1.3-secLuc plasmid (kindly provided by A. Kaiser, Leipzig University) introducing a 5' AsiSI restriction site (primer: 30 and 31). The PCR products were fused by overlap extension (OE) PCR (primer: 29 and 30) and digested with AsiSI/HindIII prior to ligation into a pcDNA3.1 vector.

### **Inositol phosphate accumulation assay**

COS-7 cells were grown in 25 cm<sup>2</sup> culture flasks until 70-80 % confluency was reached. Transient transfection was performed using Metafectene® Pro (according to the manufacturer's protocol) with a total of 4000 ng plasmid DNA per 25 cm<sup>2</sup> flask. The apelin receptor was co-transfected with the chimeric G $\alpha_{\Delta 6\text{q}14\text{myr}}$  protein (3/1 ratio) (kindly provided by E. Kostenis (Rheinische Friedrich-Wilhelms-Universität, Bonn, Germany)).<sup>[2]</sup> After 24 h, transfected cells were seeded into 384-well plates (15,000 cells in 20  $\mu\text{L}$ /well) and cultured until the experiment. Cells were stimulated with different peptide concentrations (10<sup>-7</sup>-10<sup>-12</sup> M) in HBSS, containing 20 mM LiCl, for 60 min at standard conditions. Cell lysis and inositol phosphate detection was performed as described by the manufacturer. Assay readout was

performed on a Tecan Spark plate reader (Tecan Group, Männedorf, Switzerland). Fluorophore emission was measured at (620/10 nm; 665/8 nm) after donor excitation (320/25 nm) and the HTRF ratio ( $10,000 \times 665 \text{ nm}_{\text{emission}}/620 \text{ nm}_{\text{emission}}$ ) was calculated. Concentration-response curves were generated by normalization to the respective wild type/control (bottom value = 0 %; top value = 100 %) and determination of  $EC_{50}/pEC_{50}$ , and  $E_{\text{max}}$  values was performed with the software GraphPad PRISM 5.0 (San Diego, USA).

### **Arrestin 3 recruitment assay**

COS-7 cells were transiently transfected using Metafectene® Pro (according to the manufacturer's protocol) in 25 cm<sup>2</sup> cell culture flask after reaching 70 % confluency. Transfection of was performed at a 1/20 ratio of Nluc-arr3 (BRET donor) to ET<sub>B</sub>R-GFP (BRET acceptor) plasmid DNA, balancing the total amount of plasmid DNA (4000 ng) per cell culture flask with mock DNA. One day post transfection, cells were seeded into 96-well µclear plates (100,000 cells/well) and cultured at standard conditions. All BRET experiments were performed at 37° C. The medium was replaced with BRET buffer (25 mM HEPES in HBSS, pH 7.3) and furimazine (Promega (Madison, Wisconsin)) was added (final concentration: 2.1 µM). For kinetic experiments, the baseline was monitored for 5 min before peptide addition (final concentration: 100 nM). For concentration-dependent analyses, peptides were applied in a concentration range ( $10^{-12}$  to  $10^{-7}$  M) and the BRET signal was measured after 7.5 min. BRET studies were carried out on a Tecan Spark plate reader (Tecan Group, Männedorf, Switzerland). The luminescence was monitored from 400-440 nm and fluorophore emission was detected between 505-590 nm. The fluorescence to luminescence ratio was calculated (BRET ratio) and netBRET values were determined by subtraction of BRET signals derived from unstimulated cells. Concentration-response curves were generated by normalization to the respective wild type/control (bottom value = 0 %; top value = 100 %) and determination of  $EC_{50}/pEC_{50}$ , and  $E_{\text{max}}$  values was performed with the software GraphPad PRISM 5.0 (San Diego, USA).

### **Statistical analysis**

Statistical analyses were performed with the software GraphPad PRISM 5.0 (San Diego, USA). Significances were calculated by one-way ANOVA and Tukey's t-test.

## Results

### Activation profile of Cys-P1/P3-ET<sub>A</sub>R/ET<sub>B</sub>R-GFP and proof of principle labeling

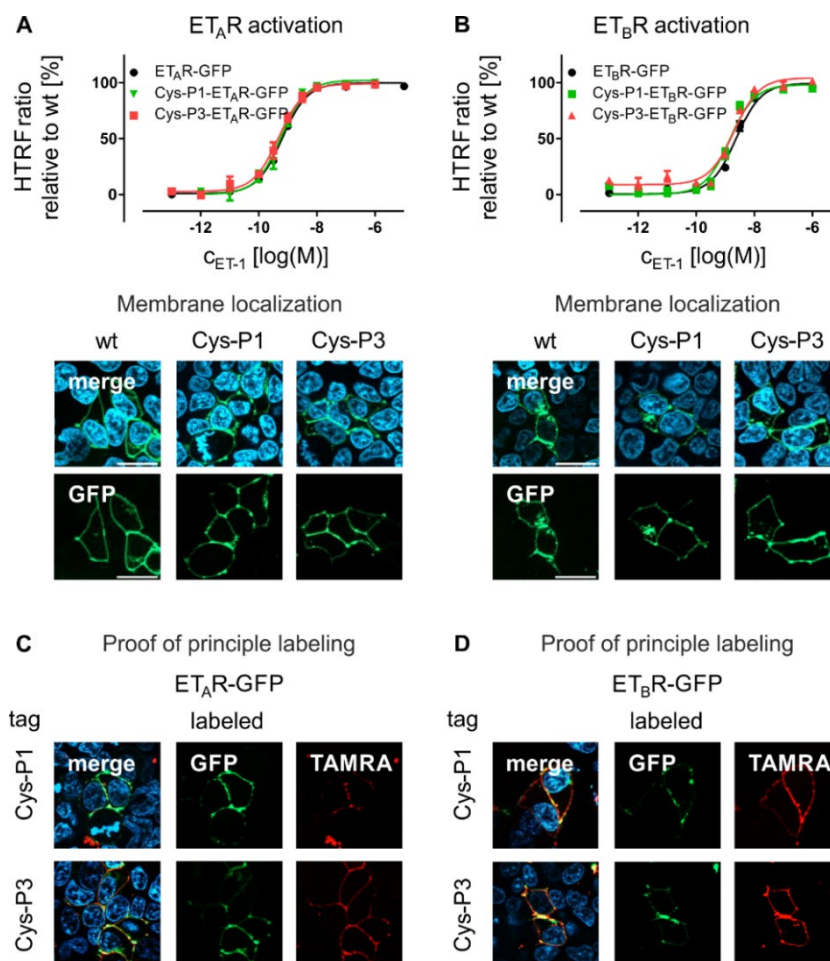

**Figure S1:** Activation profile of Cys-P1/P3-ET<sub>A</sub>R/ET<sub>B</sub>R-GFP and proof of principle labeling. GPCR activation (**A**: ET<sub>A</sub>R; **B**: ET<sub>B</sub>R) was investigated by inositol phosphate accumulation assay (transiently transfected COS-7 cells;  $n \geq 3$  performed in triplicates). Concentration-response curves represent the mean over all assay repetitions. Membrane localization was determined in HEK293 cells either expressing wt, Cys-P1- or Cys-P3-tagged receptors (lower panels). Peptide-templated acyl transfer was carried out on Cys-P1/P3-ET<sub>A</sub>R-GFP (**C**) or Cys-P1/P3-ET<sub>B</sub>R-GFP (**D**) using 200 nM TAMRA-P2/-P4 in transiently transfected HEK293 cells ( $n \geq 3$ ). Scale bar: 10  $\mu$ m. Figure B is partially adapted from Gavins et al. (2021).

**Table S2:** Receptor activation after N-terminal modification. Activation of either wild type (wt) ET<sub>A</sub>R/ET<sub>B</sub>R-GFP-spark, or Cys-P1/P3-ET<sub>A</sub>R/ET<sub>B</sub>R-GFP was assessed in inositol phosphate accumulation assays transiently transfected COS-7 cells;  $n \geq 3$  performed in triplicates).

| Receptor | ET <sub>A</sub> R-GFP |                       |                         | ET <sub>B</sub> R-GFP      |                       |                         |                            |
|----------|-----------------------|-----------------------|-------------------------|----------------------------|-----------------------|-------------------------|----------------------------|
|          | Tag                   | EC <sub>50</sub> [nM] | pEC <sub>50</sub> ± SEM | E <sub>max</sub> [%] ± SEM | EC <sub>50</sub> [nM] | pEC <sub>50</sub> ± SEM | E <sub>max</sub> [%] ± SEM |
| wt       |                       | 0.6                   | 9.2 ± 0.03              | 100 ± 1                    | 2.4                   | 8.6 ± 0.03              | 99 ± 2                     |
| Cys-P1   |                       | 0.6                   | 9.2 ± 0.07              | 102 ± 3                    | 1.4                   | 8.8 ± 0.07              | 98 ± 3                     |
| Cys-P3   |                       | 0.5                   | 9.3 ± 0.07              | 99 ± 2                     | 2.0                   | 8.7 ± 0.09              | 104 ± 4                    |

## Determination of orthogonal peptide-templated acyl transfer specificity

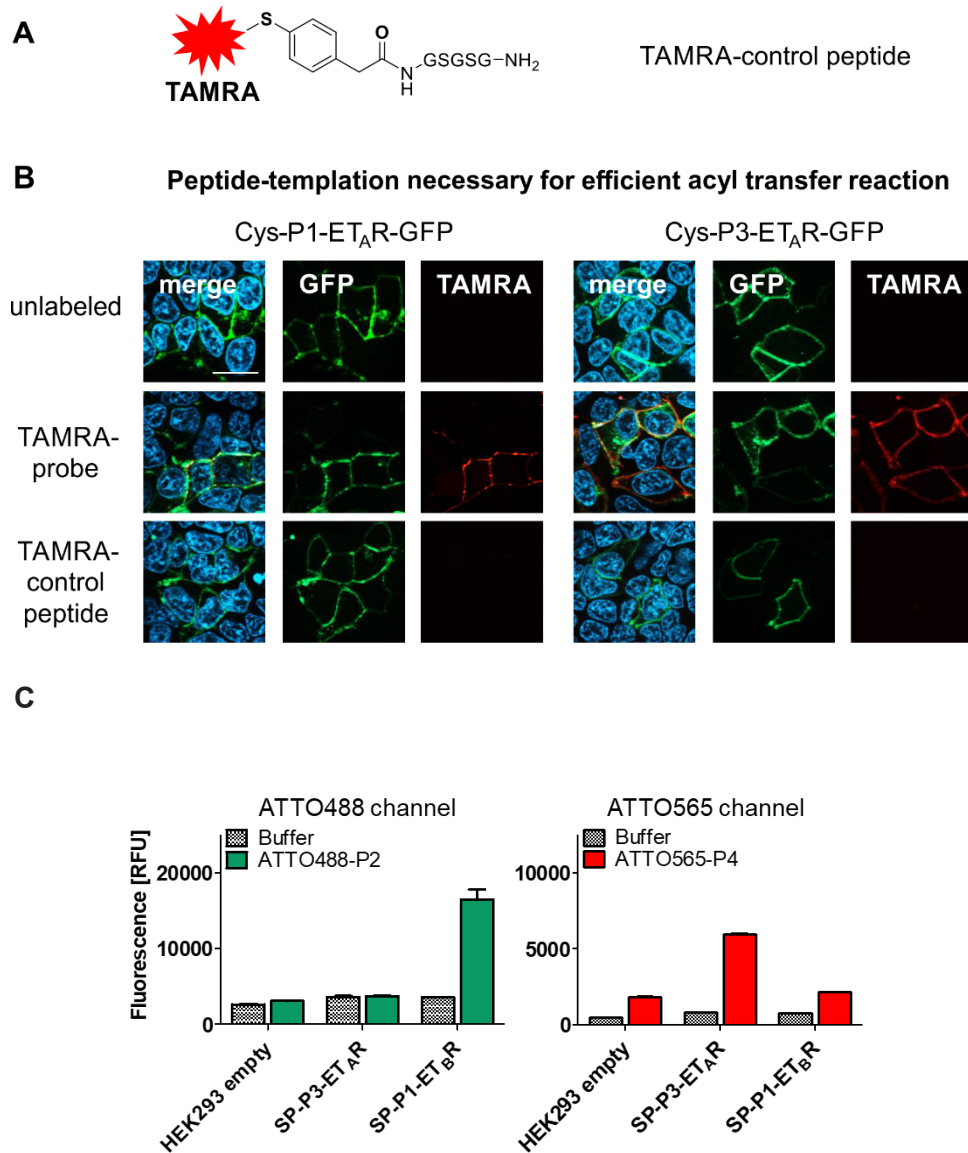

**Figure S2:** Determination of orthogonal peptide-templated acyl transfer specificity. **(A)** Structure of control peptide lacking the coiled-coil motif. **(B)** Peptide-templated labeling using either 200 nM 6-carboxytetramethylrhodamine (TAMRA)-control peptide, TAMRA-P2 or TAMRA-P4 on HEK293 transiently expressing either Cys-P1- or Cys-P3-ET<sub>A</sub>R-GFP (n=3). Scale bar: 10  $\mu$ m. **(C)** Fluorescence quantification after peptide-templated labeling. Untransfected HEK293 cells or HEK293 expressing either Cys-P3-ETAR or Cys-P1-ETBR were labeled with either Atto488-P2 or Atto565-P4. After labeling, the fluorescence was measured for each condition. Successful and efficient labeling was only observed for Cys-P1/P2 and Cys-P3/P4.



## Receptor activation after peptide-templated labeling

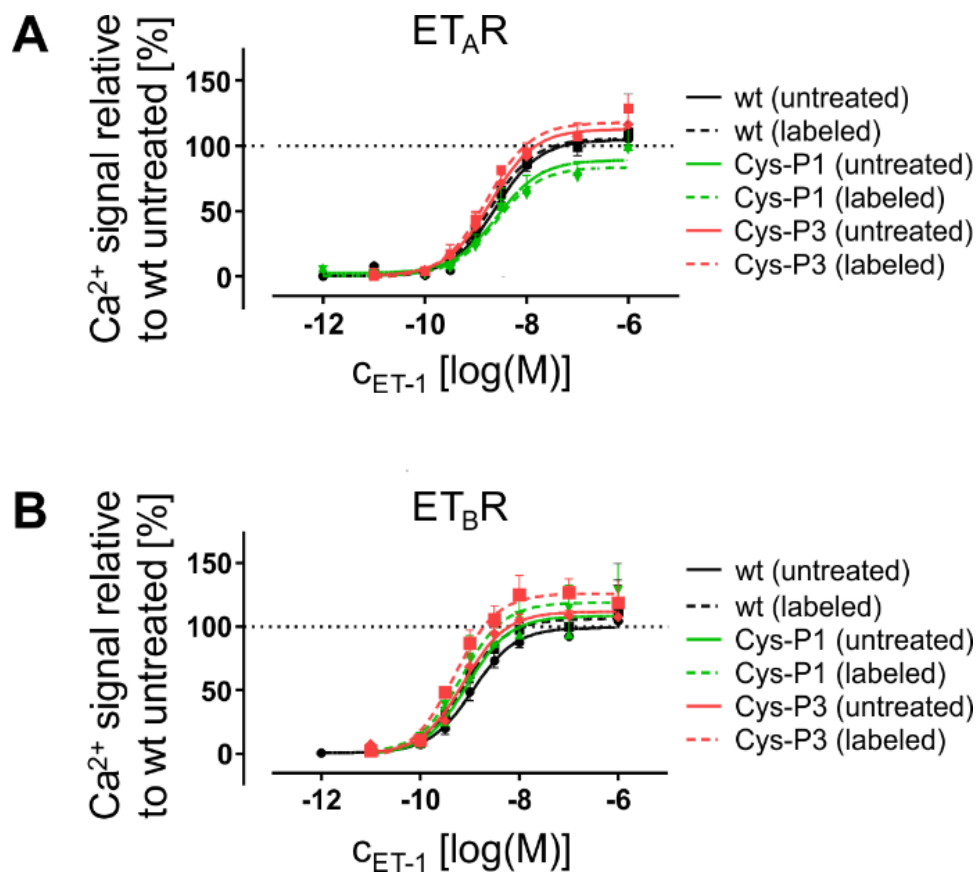

**Figure S3:** Receptor activation after peptide-templated labeling. (A) ET<sub>A</sub>R-GFP, Cys-P1-, and Cys-P3-ET<sub>A</sub>R-GFP or (B) ET<sub>B</sub>R-GFP, Cys-P1-, and Cys-P3-ET<sub>B</sub>R-GFP were labeled with 6-carboxytetramethylrhodamine (TAMRA)-P2 or -P4, using 0.1 mM TCEP. Agonist-triggered calcium flux was recorded after labeling ( $n \geq 3$ ). Black: wt GPCR; green: Cys-P1-GPCR; red: Cys-P3-GPCR. Dashed lines indicate TCEP-treated cells. Signal transduction data was normalized to the wt receptors (untreated) and represent the mean over all assay repetitions.

## Determination of labeling probe selectivity

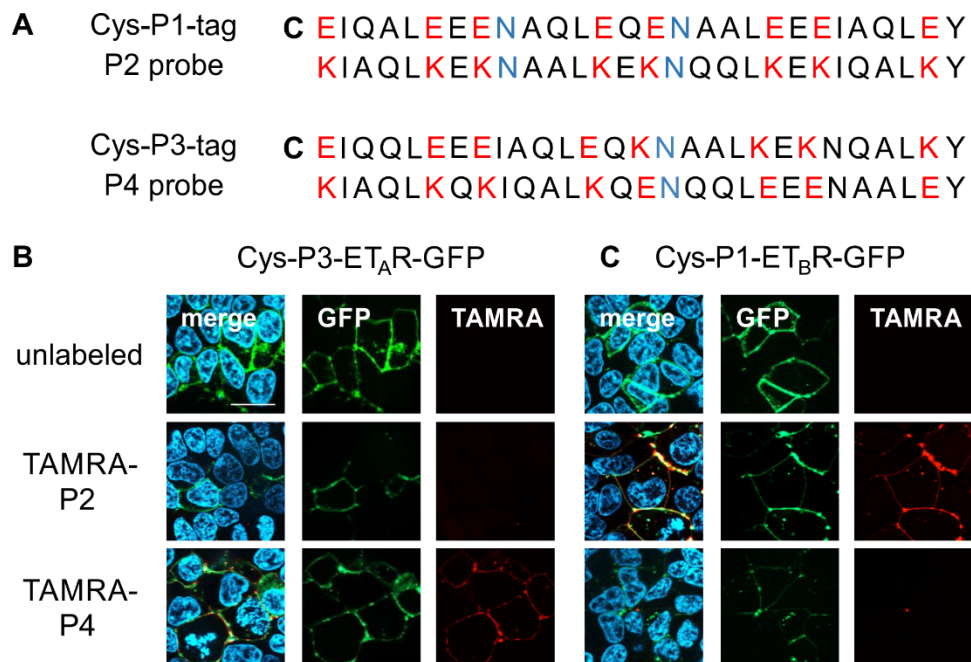

**Figure S4:** Determination of labeling probe selectivity. **(A)** Orthogonal coiled-coil peptide sequences (single-letter amino acid code) are depicted and interaction patterns are highlighted (hydrogen bonding: red; hydrophobic interactions: blue). Interaction specificity of the P1/P2 and P3/P4 coiled coil motifs was assessed by fluorescence microscopy by applying either 6-carboxytetramethylrhodamine (TAMRA)-P2 or TAMRA-P4 probe peptides to P3-tagged ET<sub>A</sub>R-GFP **(B)** and P1-tagged ET<sub>B</sub>R-GFP **(C)** expressing HEK293 cells (n=3). Scale bar: 10  $\mu$ m.

## Determination of labeling efficiency

A

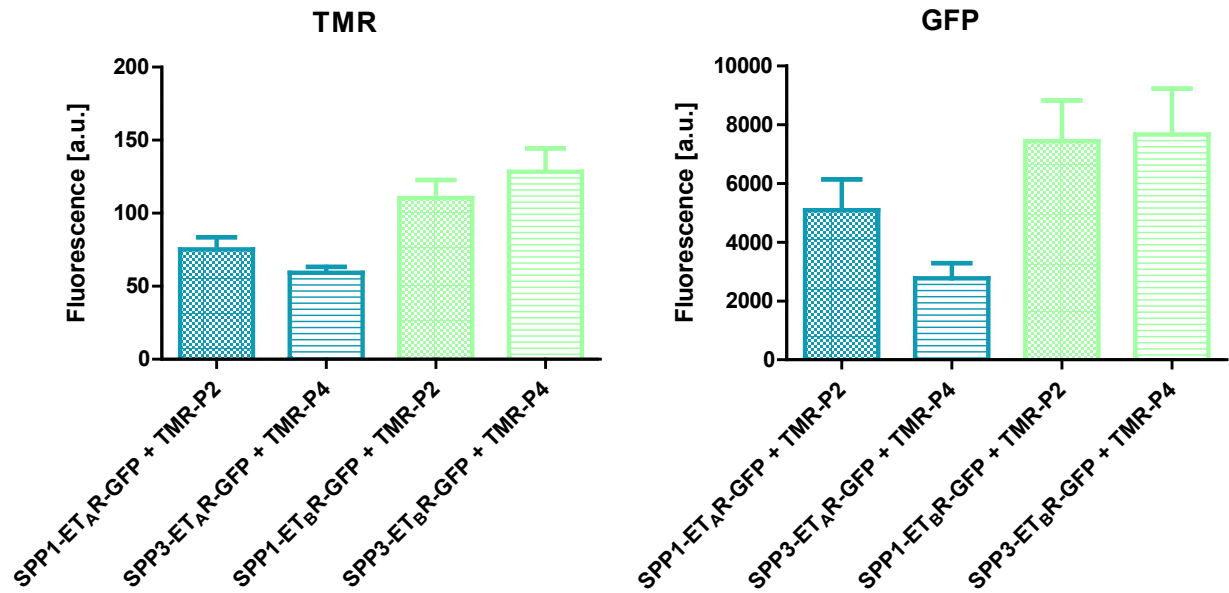

B

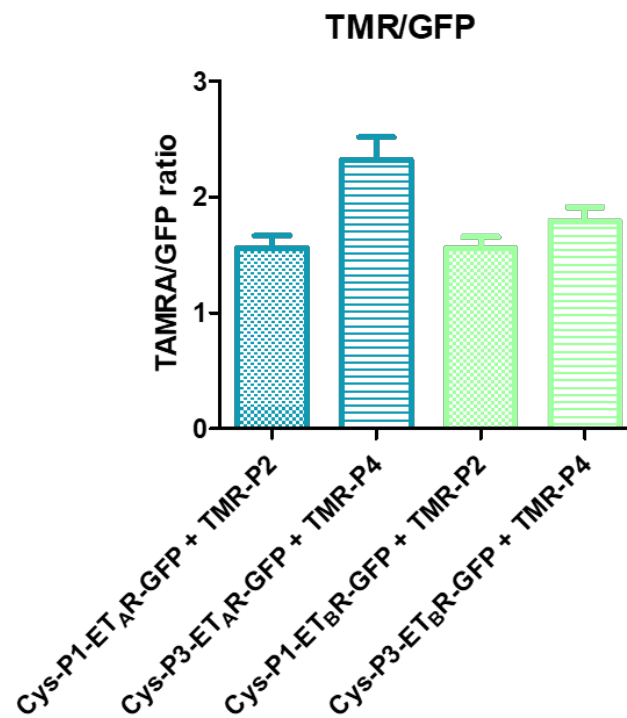

**Figure S5:** Determination of labeling efficiency on live cells. HEK293 cells, expressing either Cys-P1- or Cys-P3-tagged ET<sub>A</sub>R-GFP or ET<sub>B</sub>-GFP were labeled with TAMRA-P2 (TMR-P2) or TAMRA-P4 (TMR-P4), respectively. Total GFP and TAMRA fluorescence were measured separately (A) and the GFP/TAMRA (B) ratio was determined (n=4 in quadruplicates).

## GPCR interaction characteristics derived from proximity-dependent FRET

**Table S3:** GPCR interaction characteristics derived from proximity-dependent FRET assays for GPCRs from different species derived from N-terminal proximity-dependent FRET assays after peptide-templated GPCR labeling in live cells. Titration experiments were performed, using constant amount of donor DNA (P1-GPCR) and adding increasing amounts of acceptor DNA (P3-GPCR) for transient transfection, which were subsequently and simultaneously labeled with Atto488-P2 (FRET donor) and Atto565-P4 (FRET acceptor). Formation of specific interaction is indicated by hyperbolic fitting (HEK293 cells, n≥2 each performed in quadruplicates).

| FRET pair         |                   | FRET <sub>max</sub> ± SEM |                         | FRET <sub>50</sub> ± SEM | Quality of fit [R <sup>2</sup> ] |
|-------------------|-------------------|---------------------------|-------------------------|--------------------------|----------------------------------|
| Acceptor*         | Donor*            | observed <sup>#</sup>     | regression <sup>§</sup> |                          |                                  |
| ET <sub>A</sub> R | ET <sub>A</sub> R | 0.76 ± 0.09               | 0.96 ± 0.08             | 0.15 ± 0.06              | 0.94                             |
| ET <sub>B</sub> R | ET <sub>B</sub> R | 0.57 ± 0.08               | 0.57 ± 0.05             | 0.25 ± 0.07              | 0.96                             |
| AT <sub>1</sub> R | AT <sub>1</sub> R | 0.72 ± 0.13               | 0.98 ± 0.09             | 0.85 ± 0.17              | 0.97                             |
| APJ               | APJ               | 0.58 ± 0.13               | 0.75 ± 0.06             | 0.63 ± 0.12              | 0.98                             |
| ET <sub>A</sub> R | ET <sub>B</sub> R | 0.58 ± 0.09               | 0.65 ± 0.05             | 0.18 ± 0.04              | 0.95 <sup>a</sup>                |
| AT <sub>1</sub> R | ET <sub>A</sub> R | n.d.                      | n.d.                    | n.d.                     | 0.92 <sup>b</sup>                |
| APJ               | ET <sub>A</sub> R | n.d.                      | n.d.                    | n.d.                     | 0.99 <sup>b</sup>                |
| AT <sub>1</sub> R | ET <sub>B</sub> R | n.d.                      | n.d.                    | n.d.                     | 0.90 <sup>b</sup>                |
| APJ               | ET <sub>B</sub> R | n.d.                      | n.d.                    | n.d.                     | 0.91 <sup>b</sup>                |
| APJ               | AT <sub>1</sub> R | n.d.                      | n.d.                    | n.d.                     | 0.93 <sup>b</sup>                |

<sup>a</sup>hyperbolic fit

<sup>b</sup>linear fit

\*acceptor construct carried the N-terminal Cys-P3-tag, whereas donor constructs were equipped with the Cys-P1-tag

<sup>#</sup>observed FRET<sub>max</sub> correlates to the experimentally determined netFRET derived from the highest A/D ratio

<sup>§</sup>refers to the FRET<sub>max</sub> value derived from the hyperbolic fit in signal saturation

## Determination of ligand selectivity and GPCR activation profiles

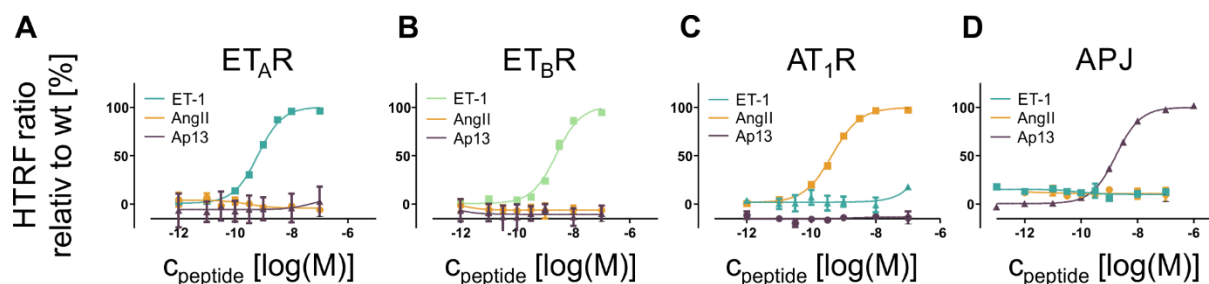

**Figure S6:** Determination of ligand selectivity and GPCR activation profiles. Peptide ligands AngII, Ap13 or ET-1 were administered to determine activation of ET<sub>A</sub>R (A), ET<sub>B</sub>R (B), AT<sub>1</sub>R (C), and APJ (D) in inositol phosphate accumulation assays by G<sub>q</sub> signaling (in transiently transfected COS-7 cells; n≥2 each performed in triplicates). Concentration-response curves represent the average of all assay repetitions.

**Table S4:** G<sub>q</sub> activation profiles of GPCR depending on cardiovascular-active peptide ligands. Receptor activation was assessed in concentration-dependent inositol phosphate accumulation assays (in transiently transfected COS-7 cells; n≥2 each performed in triplicates). Transfected cells were stimulated either with AngII, Ap13 or ET-1. Concentration-response curves represent the average of all assay repetitions.

| GPCR              | Peptide ligand        |                         |                            |                       |                         |                            |                       |                         |                            |
|-------------------|-----------------------|-------------------------|----------------------------|-----------------------|-------------------------|----------------------------|-----------------------|-------------------------|----------------------------|
|                   | AngII                 |                         |                            | Ap13                  |                         |                            | ET-1                  |                         |                            |
|                   | EC <sub>50</sub> [nM] | pEC <sub>50</sub> ± SEM | E <sub>max</sub> [%] ± SEM | EC <sub>50</sub> [nM] | pEC <sub>50</sub> ± SEM | E <sub>max</sub> [%] ± SEM | EC <sub>50</sub> [nM] | pEC <sub>50</sub> ± SEM | E <sub>max</sub> [%] ± SEM |
| ET <sub>A</sub> R | n.d.                  | n.d.                    | n.d.                       | n.d.                  | n.d.                    | n.d.                       | 0.6                   | 9.2 ± 0.03              | 100 ± 1                    |
| ET <sub>B</sub> R | n.d.                  | n.d.                    | n.d.                       | n.d.                  | n.d.                    | n.d.                       | 2.4                   | 8.6 ± 0.03              | 99 ± 2                     |
| AT <sub>1</sub> R | 0.4                   | 9.3 ± 0.02              | 100 ± 1                    | n.d.                  | n.d.                    | n.d.                       | n.d.                  | n.d.                    | n.d.                       |
| APJ               | n.d.                  | n.d.                    | n.d.                       | 1.7                   | 8.8 ± 0.02              | 100 ± 1                    | n.d.                  | n.d.                    | n.d.                       |

n.d. = not detectable, Ang II - angiotensin II; AT<sub>1</sub>R - angiotensin II receptor 1; Ap13 - apelin-13 -; APJ - apelin receptor; ET<sub>A</sub>R - endothelin A receptor; ET<sub>B</sub>R - endothelin B receptor; ET-1 - endothelin 1

## Agonist-internalization of GPCRs labeled by peptide-templated acyl transfer reaction

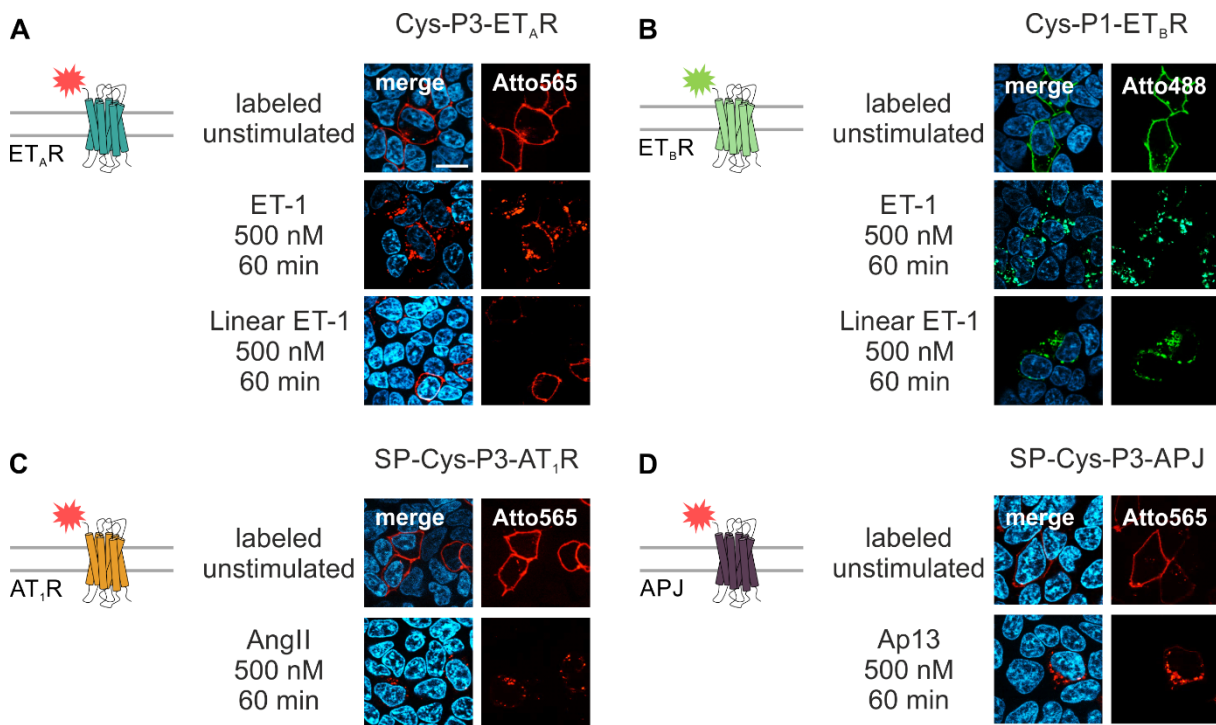

**Figure S7:** Agonist-internalization of GPCRs labeled by peptide-templated acyl transfer reaction in live cells. HEK293 were either transfected with Cys-P3-ET<sub>A</sub>R (**A**), Cys-P1-ET<sub>B</sub>R (**B**), SP-Cys-P3-AT<sub>1</sub>R (**C**), or SP-Cys-P3-APJ (**D**). Membrane embedded GPCRs were labeled with Atto488-P2 or Atto565-P4, respectively, prior to agonist application. ET<sub>A</sub>R- and ET<sub>B</sub>R-expressing HEK293 cells were stimulated with either 500 nM ET-1 (dual agonist) or [4Ala<sup>1,3,11,15</sup>,Nle<sup>7</sup>]-ET-1 (linear ET-1, ET<sub>B</sub>R-selective agonist) for 1 h after labeling prior to picture acquisition (n=3). For cells, expressing AT<sub>1</sub>R or APJ, 500 nM AngII or Ap13 were applied, respectively, for 60 min after labeling prior to picture acquisition (n=3). Scale bar: 10 μm.

## Impact of receptor activation on internalization in co-expression setups

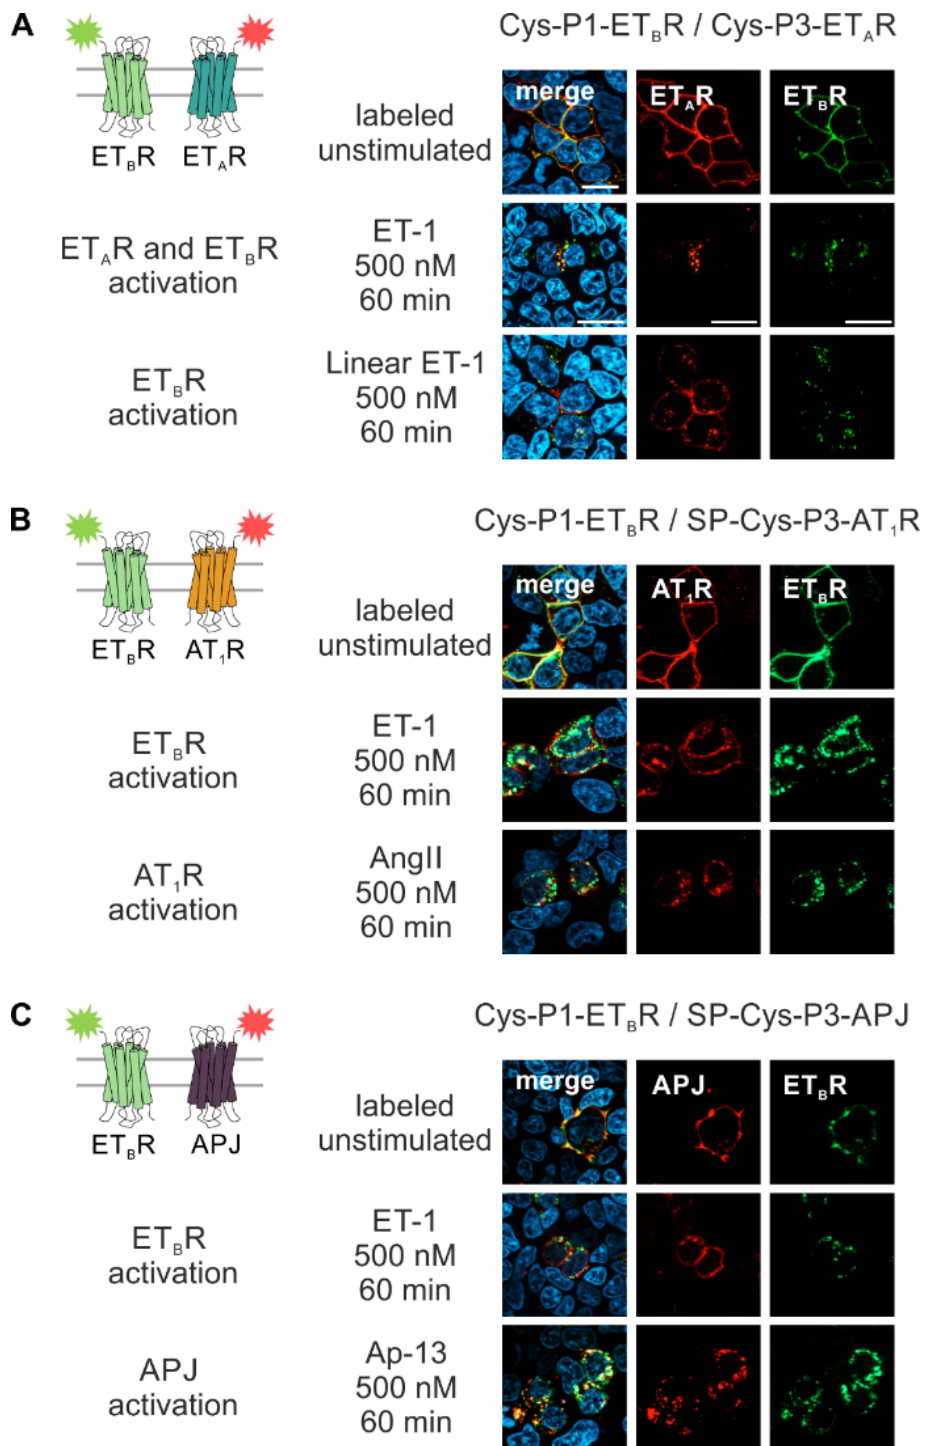

**Figure S8:** Impact of receptor activation on the agonist-induced internalization of the ET<sub>B</sub>R, co-expressed with either ET<sub>A</sub>R, AT<sub>1</sub>R, or APJ. HEK293 were transfected with Cys-P1-ET<sub>B</sub>R and either Cys-P3-ET<sub>A</sub>R (**A**), SP-Cys-P3-AT<sub>1</sub>R (**B**), or SP-Cys-P3-APJ (**C**). Membrane embedded GPCRs were labeled with Atto488-P2 (green) and Atto565-P4 (red), respectively. After peptide-templated labeling, cells were stimulated with either 500 nM ET-1 (for ET<sub>A</sub>R or ET<sub>B</sub>R activation), 500 nM [4Ala<sup>1,3,11,15</sup>,Nle<sup>7</sup>]-ET-1 (linear ET-1, for selective-ET<sub>B</sub>R activation in the presence of ET<sub>A</sub>R), 500 nM AngII (for AT<sub>1</sub>R activation), or Ap-13 (for APJ activation) for 60 min under cell culture conditions prior to fluorescence microscopy (n≥2, representative images are shown). Scale bar: 10 μm.

## Membrane residence time of GPCRs in the absence of agonists

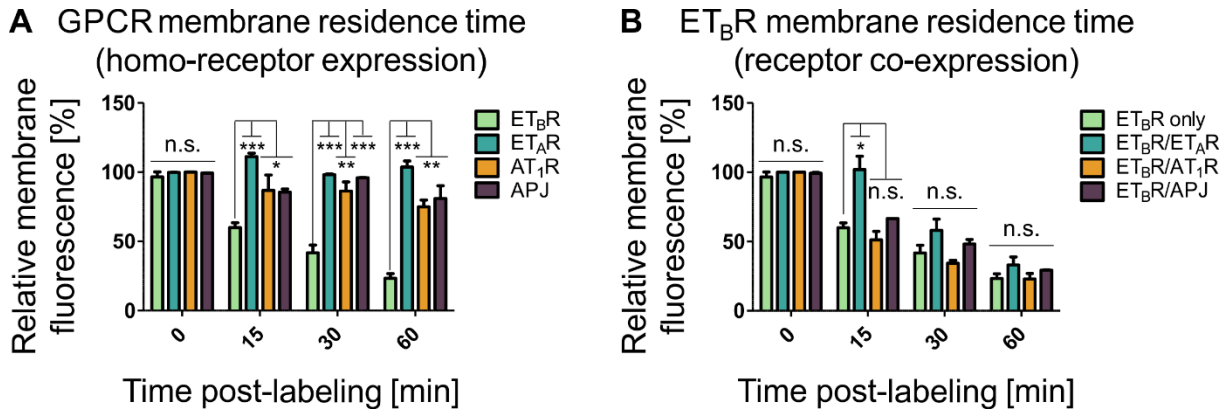

**Figure S9:** Membrane residence time of N-terminally labeled GPCRs in the absence of agonist administration. **(A)** Membrane-embedded Cys-P3-ET<sub>A</sub>R, Cys-P1-ET<sub>B</sub>R, SP-Cys-P3-AT<sub>1</sub>R, or SP-Cys-P3-APJ were stained using the Atto488-P2 or Atto565-P4 peptide (ET<sub>A</sub>R: blue, ET<sub>B</sub>R: light green, AT<sub>1</sub>R: orange, APJ: purple). **(B)** Membrane residence time of Cys-P1-ET<sub>B</sub>R co-expressed with Cys-P3-ET<sub>A</sub>R, SP-Cys-P3-AT<sub>1</sub>R or SP-Cys-P3-APJ were labeled using the Atto488-P2 and Atto565-P4 peptide probe (ET<sub>B</sub>R/mock: light green, ET<sub>B</sub>R/ET<sub>A</sub>R: blue, ET<sub>B</sub>R/AT<sub>1</sub>R: orange, ET<sub>B</sub>R/APJ: purple). Picture acquisition was performed at distinct time point (0, 15, 30, and 60 min) post-labeling without agonist application. Membrane fluorescence was quantified for each time point and normalized to 0 min (100 %) and background fluorescence (0 %). Quantitative data represent the average over all assay repetitions (n≥2 with 10-15 cells analyzed per time point and experiment). Significance was determined by one-way ANOVA and Tukey's post test, n.s.: not significant, \*\*: P<0.01; \*\*\*: P<0.001). Scale bar: 10 μm.



## Selective ET<sub>B</sub>R-mediated Ca<sup>2+</sup> flux in the presence of co-transfected ET<sub>A</sub>R

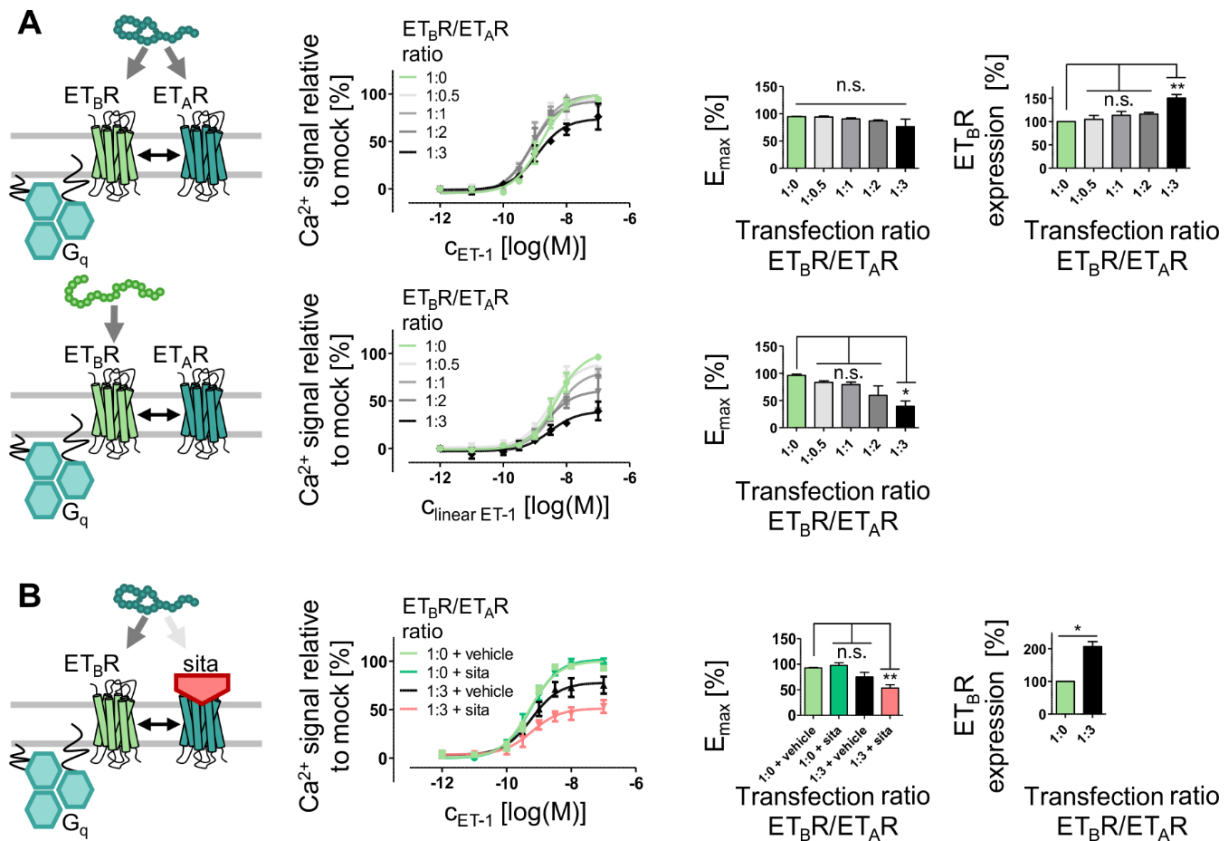

**Figure S10:** Selective ET<sub>B</sub>R-mediated Ca<sup>2+</sup> flux in the presence of co-transfected ET<sub>A</sub>R. COS-7 cells were transiently transfected with constant amounts of ET<sub>B</sub>R-GFP increasing amounts of Cys-P3-ET<sub>A</sub>R in a ratio range from 1:0 to 1:3. Cells, expressing both ET<sub>A</sub>R and ET<sub>B</sub>R were stimulated with the ET<sub>A</sub>R/ET<sub>B</sub>R dual agonist ET-1 (**A**) or the ET<sub>B</sub>R-selective [4Ala<sup>1,3,11,15</sup>, Nle<sup>7</sup>]-ET-1 (linear ET-1). The ET<sub>A</sub>R-selective antagonist sitaxentan (red symbol, sita) was applied for selective ET<sub>B</sub>R activation by ET-1 in the presence of co-expressed ET<sub>A</sub>R (**C**). ET<sub>B</sub>R-GFP expression was monitored by GFP fluorescence. Ca<sup>2+</sup> flux mediated by G<sub>q</sub> protein (turquoise) activation was monitored in COS-7 cells in duplicates and concentration-response curves represent the average over all assay repetitions (n=3; significance was determined by one-way ANOVA and Tukey's post test, n.s.: not significant, \*: P<0.05, \*\*: P<0.01).

**Table S5:** Selective ET<sub>B</sub>R-mediated Ca<sup>2+</sup> flux in the presence of co-transfected ET<sub>A</sub>R. COS-7 cells were transiently transfected with constant amounts of ET<sub>B</sub>R-GFP increasing amounts of Cys-P3-ET<sub>A</sub>R in a ratio range from 1:0 to 1:3. Cells, expressing both ET<sub>A</sub>R and ET<sub>B</sub>R were stimulated with the ET<sub>A</sub>R/ET<sub>B</sub>R dual agonist ET-1 or the ET<sub>B</sub>R-selective [4Ala<sup>1,3,11,15</sup>, Nle<sup>7</sup>]-ET-1. ET<sub>B</sub>R-GFP expression was monitored by GFP fluorescence. Ca<sup>2+</sup> flux was monitored in COS-7 cells in duplicates and concentration-response curves represent the average over all assay repetitions (n=3).

| Co-transfection ratio                   | Relative Ca <sup>2+</sup> flux initiated by ET <sub>B</sub> R-GFP |                       |                         |                            |                       |                         |                            |        |
|-----------------------------------------|-------------------------------------------------------------------|-----------------------|-------------------------|----------------------------|-----------------------|-------------------------|----------------------------|--------|
|                                         | ET <sub>B</sub> R expression [%] ± SEM                            | ET-1                  |                         |                            | Linear ET-1           |                         |                            |        |
|                                         |                                                                   | EC <sub>50</sub> [nM] | pEC <sub>50</sub> ± SEM | E <sub>max</sub> [%] ± SEM | EC <sub>50</sub> [nM] | pEC <sub>50</sub> ± SEM | E <sub>max</sub> [%] ± SEM |        |
| 1:0                                     | 100 ± 1                                                           | 1.5                   | 8.8 ± 0.09              | 100 ± 5                    | 4.7                   | 8.3 ± 0.09              | 103 ± 6                    |        |
| 1:0.5                                   | 105 ± 8                                                           | 0.9                   | 9.0 ± 0.15              | 96 ± 7                     | 3.1                   | 8.5 ± 0.10              | 90 ± 5                     |        |
| ET <sub>B</sub> R/<br>ET <sub>A</sub> R | 1:1                                                               | 113 ± 8               | 0.9                     | 9.1 ± 0.12                 | 99 ± 5                | 4.5                     | 8.3 ± 0.08                 | 81 ± 4 |
|                                         | 1:2                                                               | 116 ± 3               | 0.8                     | 9.1 ± 0.10                 | 93 ± 4                | 2.4                     | 8.6 ± 0.18                 | 61 ± 6 |
|                                         | 1:3                                                               | 150 ± 8               | 1.2                     | 8.9 ± 0.14                 | 74 ± 5                | 3.1                     | 8.5 ± 0.19                 | 39 ± 5 |

**Table S6:** Selective ET<sub>B</sub>R-mediated Ca<sup>2+</sup> flux in the presence of co-transfected ET<sub>A</sub>R. COS-7 cells were transiently transfected with constant amounts of ET<sub>B</sub>R-GFP and a 3-fold excess of Cys-P3-ET<sub>A</sub>R. Cells, expressing both ET<sub>A</sub>R and ET<sub>B</sub>R were stimulated with the ET<sub>A</sub>R/ET<sub>B</sub>R dual agonist ET-1 in the absence and presence of the ET<sub>A</sub>R-selective antagonist sitaxentan or DMSO (vehicle control). ET<sub>B</sub>R-GFP expression was monitored by GFP fluorescence. Ca<sup>2+</sup> flux was monitored in COS-7 cells in duplicates and concentration-response curves represent the average over all assay repetitions (n=3).

| Co-transfection ratio                   | Relative Ca <sup>2+</sup> flux initiated by ET <sub>B</sub> R-GFP |                       |                         |                            |                          |                         |                            |         |
|-----------------------------------------|-------------------------------------------------------------------|-----------------------|-------------------------|----------------------------|--------------------------|-------------------------|----------------------------|---------|
|                                         | ET <sub>B</sub> R expression [%] ± SEM                            | EC <sub>50</sub> [nM] | ET-1 + vehicle (DMSO)   |                            | ET-1 + 500 nM Sitaxentan |                         |                            |         |
|                                         |                                                                   |                       | pEC <sub>50</sub> ± SEM | E <sub>max</sub> [%] ± SEM | EC <sub>50</sub> [nM]    | pEC <sub>50</sub> ± SEM | E <sub>max</sub> [%] ± SEM |         |
| ET <sub>B</sub> R/<br>ET <sub>A</sub> R | 1:0                                                               | 100 ± 1               | 0.5                     | 9.3 ± 0.07                 | 100 ± 3                  | 0.6                     | 9.3 ± 0.09                 | 102 ± 4 |
|                                         | 1:3                                                               | 206 ± 15              | 0.6                     | 9.2 ± 0.13                 | 88 ± 4                   | 0.6                     | 9.2 ± 0.18                 | 51 ± 4  |

## Impact of GPCR co-expression on ET<sub>B</sub>R-mediated Ca<sup>2+</sup> flux in HEK293

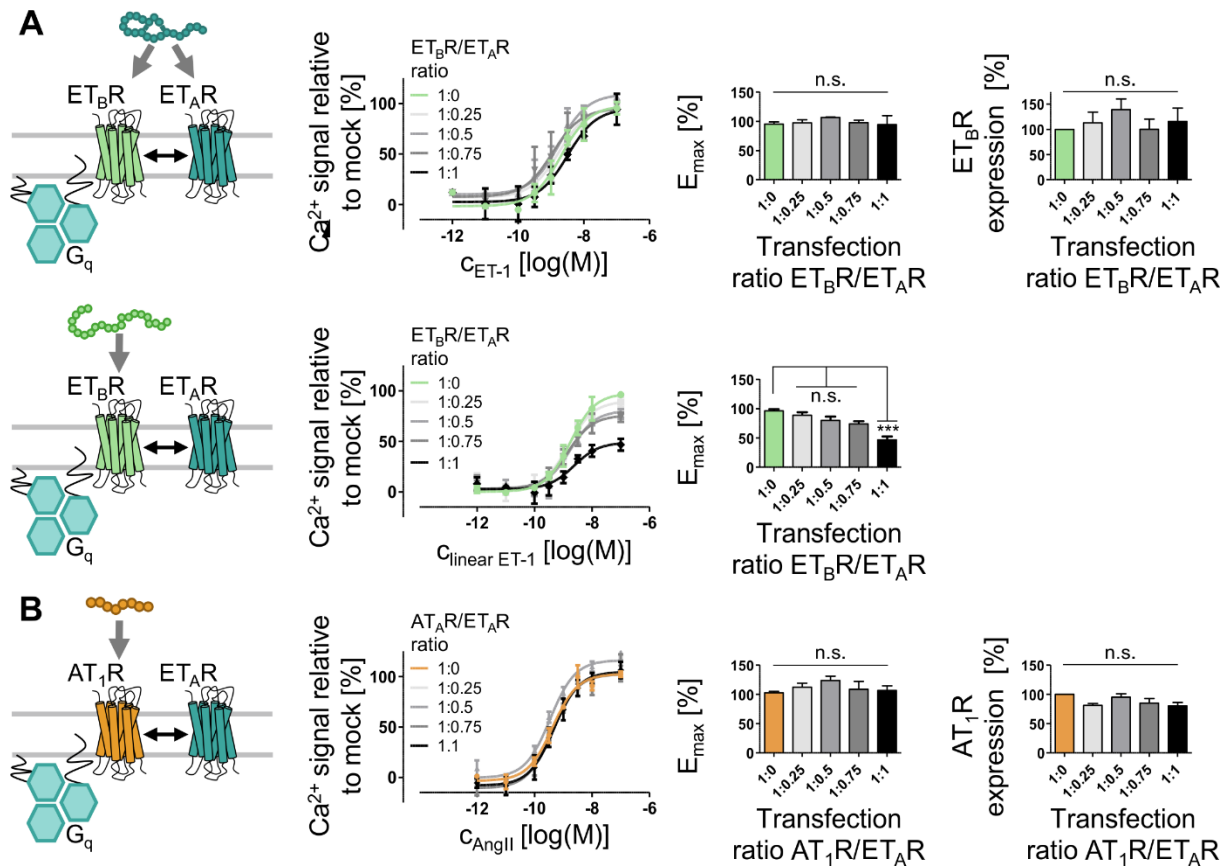

**Figure S11:** Impact of GPCR co-expression on ET<sub>B</sub>R-mediated Ca<sup>2+</sup> flux in HEK293 cells. **(A)** Constant amounts of ET<sub>B</sub>R-GFP were co-transfected with increasing amounts of Cys-P3-ET<sub>A</sub>R in a ratio range from 1:0 to 1:1. Cells, expressing both ET<sub>A</sub>R and ET<sub>B</sub>R were stimulated with the ET<sub>A</sub>R/ET<sub>B</sub>R dual agonist ET-1 (upper row) or the ET<sub>B</sub>R-selective [4Ala<sup>1,3,11,15</sup>, Nle<sup>7</sup>]-ET-1 (lower row). ET<sub>B</sub>R-GFP expression was monitored by GFP fluorescence. **(B)** To validate the specific effect, constant amounts of AT<sub>1</sub>R-YFP were co-transfected with increasing amounts of Cys-P3-ET<sub>A</sub>R in a ratio range from 1:0 to 1:1 and cells AngII for AT<sub>1</sub>R activation. AT<sub>1</sub>R-YFP expression was monitored by YFP fluorescence. Ca<sup>2+</sup> flux mediated by G<sub>q</sub> protein (turquoise) activation was monitored in HEK293 cells in duplicates and concentration-response curved represent the average over all assay repetitions (n=3; significance was determined by one-way ANOVA and Tukey's post test, n.s.: not significant, \*\*\*: P < 0.001).

**Table S7:** Characterization of ET<sub>B</sub>R signaling in transiently transfected HEK293 cells. Constant amounts of ET<sub>B</sub>R-GFP were co-transfected with increasing amounts of Cys-P3-ET<sub>A</sub>R. Cells, expressing both ET<sub>A</sub>R and ET<sub>B</sub>R were stimulated with the ET<sub>A</sub>R/ET<sub>B</sub>R dual agonist ET-1, the ET<sub>B</sub>R-selective [4Ala<sup>1,3,11,15</sup>, Nle<sup>7</sup>]-ET-1. ET<sub>B</sub>R-GFP expression was monitored by GFP fluorescence. Ca<sup>2+</sup> flux was monitored in HEK293 cells in duplicates and concentration-response curves represent the average over all assay repetitions (n=3).

| Co-transfection ratio                   | Relative Ca <sup>2+</sup> flux initiated by ET <sub>B</sub> R-GFP |                       |                         |                            |                       |                         |                            |        |
|-----------------------------------------|-------------------------------------------------------------------|-----------------------|-------------------------|----------------------------|-----------------------|-------------------------|----------------------------|--------|
|                                         | ET <sub>B</sub> R expression [%] ± SEM                            | ET-1                  |                         |                            | Linear ET-1           |                         |                            |        |
|                                         |                                                                   | EC <sub>50</sub> [nM] | pEC <sub>50</sub> ± SEM | E <sub>max</sub> [%] ± SEM | EC <sub>50</sub> [nM] | pEC <sub>50</sub> ± SEM | E <sub>max</sub> [%] ± SEM |        |
| 1:0                                     | 100 ± 1                                                           | 2.0                   | 8.7 ± 0.12              | 100 ± 6                    | 1.7                   | 8.8 ± 0.10              | 98 ± 5                     |        |
| 1:0.25                                  | 112 ± 21                                                          | 1.8                   | 8.8 ± 0.11              | 98 ± 5                     | 1.5                   | 8.8 ± 0.13              | 90 ± 6                     |        |
| ET <sub>B</sub> R/<br>ET <sub>A</sub> R | 1:0.5                                                             | 139 ± 21              | 1.8                     | 8.8 ± 0.18                 | 109 ± 9               | 1.7                     | 8.8 ± 0.17                 | 80 ± 6 |
|                                         | 1:0.75                                                            | 100 ± 20              | 1.1                     | 9.0 ± 0.27                 | 95 ± 11               | 1.4                     | 8.8 ± 0.15                 | 76 ± 5 |
|                                         | 1:2                                                               | 116 ± 27              | 3.2                     | 8.5 ± 0.21                 | 95 ± 11               | 2.4                     | 8.6 ± 0.24                 | 49 ± 6 |

**Table S8:** Characterization of AT<sub>1</sub>R signaling in transiently transfected HEK293 cells. Constant amounts of AT<sub>1</sub>R-YFP were co-transfected with increasing amounts of Cys-P3-AT<sub>1</sub>R. Cells, expressing both receptors were stimulated with the AngII for selective AT<sub>1</sub>R activation. AT<sub>1</sub>R-YFP expression was monitored by YFP fluorescence. Ca<sup>2+</sup> flux was monitored in HEK293 cells in duplicates and concentration-response curves represent the average over all assay repetitions (n=3).

| Co-transfection ratio                   | Relative Ca <sup>2+</sup> flux initiated by AT <sub>1</sub> R-YFP |                       |                         |                            |         |
|-----------------------------------------|-------------------------------------------------------------------|-----------------------|-------------------------|----------------------------|---------|
|                                         | AT <sub>1</sub> R expression [%] ± SEM                            | AngII                 |                         |                            |         |
|                                         |                                                                   | EC <sub>50</sub> [nM] | pEC <sub>50</sub> ± SEM | E <sub>max</sub> [%] ± SEM |         |
| 1:0                                     | 100 ± 1                                                           | 0.4                   | 9.4 ± 0.10              | 103 ± 4                    |         |
| 1:0.25                                  | 81 ± 3                                                            | 0.5                   | 9.3 ± 0.11              | 103 ± 5                    |         |
| AT <sub>1</sub> R/<br>ET <sub>A</sub> R | 1:0.5                                                             | 95 ± 6                | 0.3                     | 9.5 ± 0.10                 | 116 ± 4 |
|                                         | 1:0.75                                                            | 85 ± 8                | 0.4                     | 9.4 ± 0.12                 | 102 ± 5 |
|                                         | 1:2                                                               | 81 ± 5                | 0.5                     | 9.3 ± 0.12                 | 105 ± 5 |

## Arrestin recruitment to activated ET<sub>B</sub>R in co-expression setups

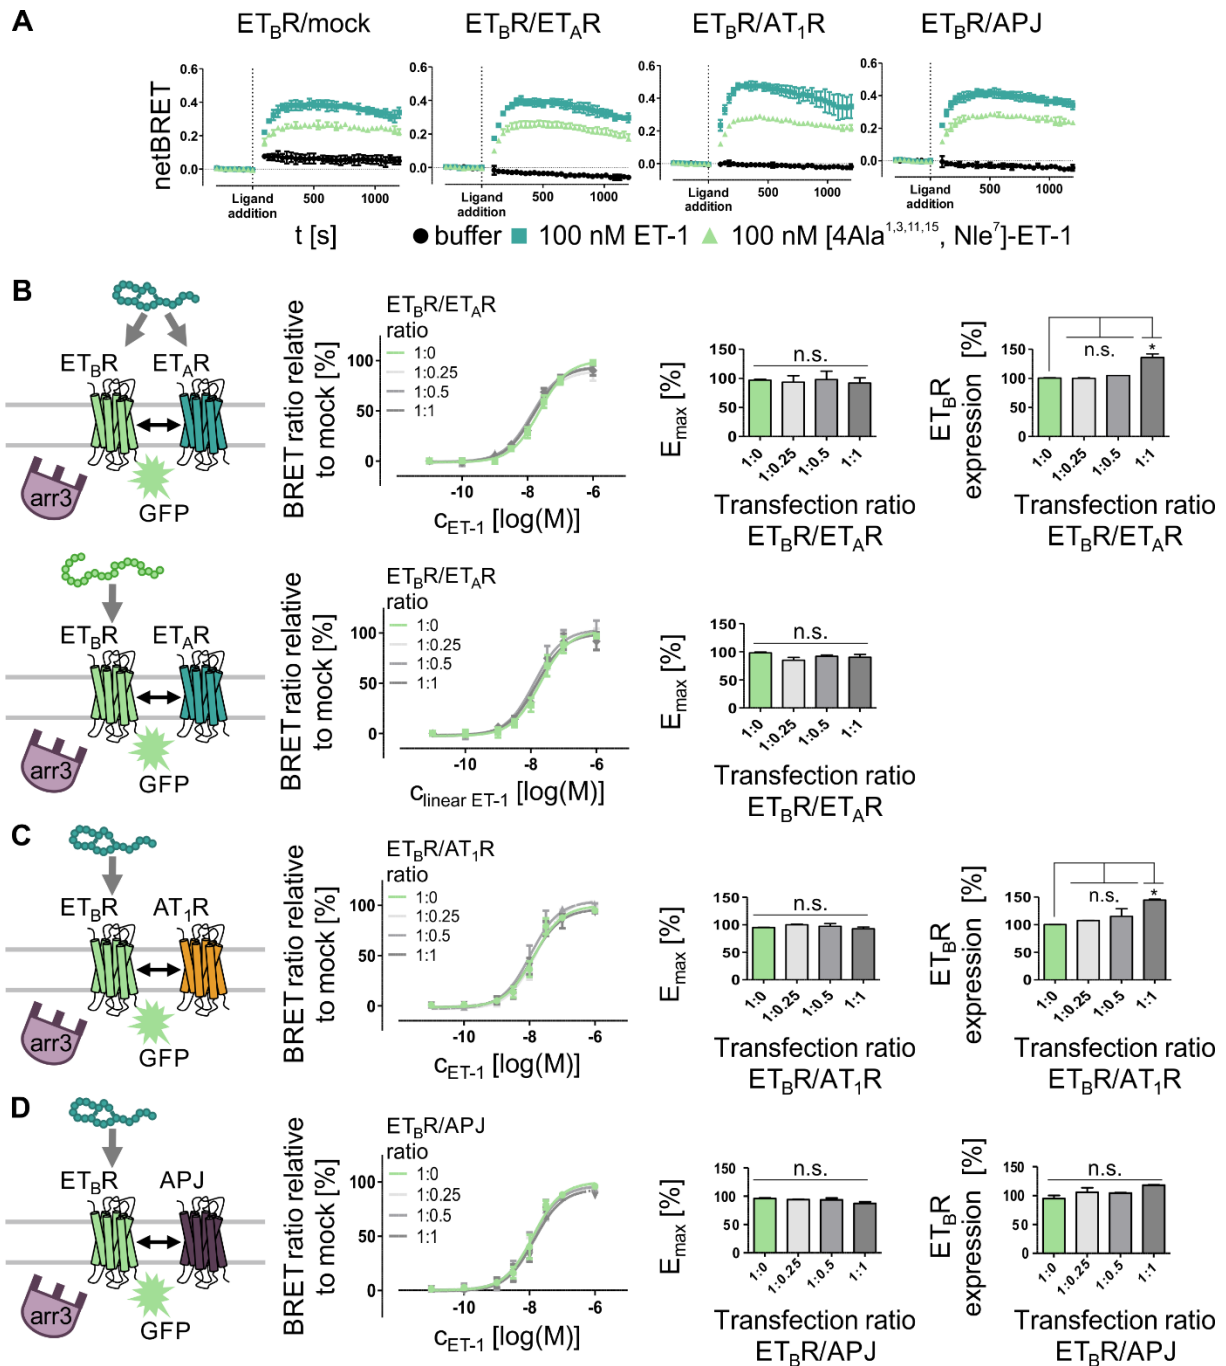

**Figure S12:** Investigation of arrestin recruitment to activated ET<sub>B</sub>R in the presence of co-expressed GPCRs. **(A)** For kinetic studies of arr3 recruitment, COS-7 cells were transiently transfected with constant amounts of ET<sub>B</sub>R-GFP and increasing amounts of Cys-P3-tagged ET<sub>A</sub>R, AT<sub>1</sub>R or APJ (left to right). The recruitment was monitored for 5 min (basal, light grey) before ligand addition and 15 min after addition of ET-1 (black) or linear ET-1 (dark grey). Kinetic analyses were performed in quadruplicates (n=3) and one representative kinetic trace is shown. Concentration-dependent investigation of arr3 (purple) recruitment to ET<sub>B</sub>R-GFP in the presence Cys-P3-ET<sub>A</sub>R (**B/C**), SP-Cys-P3-AT<sub>1</sub>R (**E**) or SP-Cys-P3-APJ (**F**). Transfected cells were stimulated with ET-1 (**B**, **E**, **F**) or the ET<sub>B</sub>R-selective [4Ala<sup>1,3,11,15</sup>, Nle<sup>7</sup>]-ET-1 (**C**). ET<sub>B</sub>R expression was monitored by total GFP fluorescence. Arr3 recruitment was investigated in triplicates and concentration-response curves represent the average of all assay repetitions (n=3). Significance was determined by one-way ANOVA and Tukey's post test, n.s.: not significant, \*: P<0.05). Scale bar: 10  $\mu$ m.

**Table S9:** Characterization of arr3 recruitment to ET<sub>B</sub>R-GFP was assessed by concentration-dependent analyses in the presence Cys-P3-ET<sub>A</sub>R, SP-Cys-P3-AT<sub>1</sub>R, or SP-Cys-P3-APJ. Transfected COS-7 cells were stimulated with ET-1 or the ET<sub>B</sub>R-selective [4Ala<sup>1,3,11,15</sup>, Nle<sup>7</sup>]-ET-1 (linear ET-1). ET<sub>B</sub>R expression was monitored by total GFP fluorescence. Arr3 recruitment was investigated in triplicates and concentration-response curves represent the average of all assay repetitions (n=3).

| Co-transfection ratio                   | Arrestin 3 recruitment to ET <sub>B</sub> R-GFP |                       |                         |                            |                       |                         |                            |         |
|-----------------------------------------|-------------------------------------------------|-----------------------|-------------------------|----------------------------|-----------------------|-------------------------|----------------------------|---------|
|                                         | ET <sub>B</sub> R expression [%] ± SEM          | ET-1                  |                         |                            | Linear ET-1           |                         |                            |         |
|                                         |                                                 | EC <sub>50</sub> [nM] | pEC <sub>50</sub> ± SEM | E <sub>max</sub> [%] ± SEM | EC <sub>50</sub> [nM] | pEC <sub>50</sub> ± SEM | E <sub>max</sub> [%] ± SEM |         |
| ET <sub>B</sub> R/<br>ET <sub>A</sub> R | 1:0                                             | 100 ± 1               | 19                      | 7.7 ± 0.9                  | 102 ± 5               | 23                      | 7.6 ± 0.06                 | 100 ± 3 |
|                                         | 1:0.25                                          | 100 ± 1               | 16                      | 7.8 ± 0.10                 | 100 ± 5               | 14                      | 7.8 ± 0.05                 | 91 ± 2  |
|                                         | 1:0.5                                           | 105 ± 1               | 13                      | 7.9 ± 0.11                 | 104 ± 5               | 14                      | 7.9 ± 0.05                 | 94 ± 2  |
|                                         | 1:1                                             | 136 ± 6               | 15                      | 7.8 ± 0.09                 | 99 ± 4                | 15                      | 7.8 ± 0.06                 | 94 ± 6  |
| ET <sub>B</sub> R/<br>AT <sub>1</sub> R | 1:0                                             | 100 ± 1               | 13                      | 7.9 ± 0.09                 | 100 ± 4               | n.d.                    | n.d.                       | n.d.    |
|                                         | 1:0.25                                          | 107 ± 1               | 16                      | 7.8 ± 0.07                 | 106 ± 4               | n.d.                    | n.d.                       | n.d.    |
|                                         | 1:0.5                                           | 115 ± 14              | 11                      | 8.0 ± 0.10                 | 104 ± 5               | n.d.                    | n.d.                       | n.d.    |
|                                         | 1:1                                             | 144 ± 2               | 13                      | 7.9 ± 0.09                 | 98 ± 0.09             | n.d.                    | n.d.                       | n.d.    |
| ET <sub>B</sub> R/<br>APJ               | 1:0                                             | 95 ± 5                | 13                      | 7.9 ± 0.08                 | 100 ± 4               | n.d.                    | n.d.                       | n.d.    |
|                                         | 1:0.25                                          | 105 ± 8               | 14                      | 7.9 ± 0.09                 | 98 ± 4                | n.d.                    | n.d.                       | n.d.    |
|                                         | 1:0.5                                           | 104 ± 1               | 12                      | 7.9 ± 0.10                 | 97 ± 5                | n.d.                    | n.d.                       | n.d.    |
|                                         | 1:1                                             | 118 ± 1               | 14                      | 7.9 ± 0.09                 | 94 ± 4                | n.d.                    | n.d.                       | n.d.    |

n.d. = not determined

## References

- [1] S. A. Vishnivetskiy, L. E. Gimenez, D. F. Francis, S. M. Hanson, W. L. Hubbell et al., *J. Biol. Chem.* **2011** 286, 24288-24299.
- [2] E. Kostenis, *J. Recept. Signal Transduct. Res.* **2002**, 22, 267-281.
